# Supplementary material
Source: PubMed Central journal article supplement (PMC4257865)
Supplement: NIHMS628091-supplement-1.pdf [file NIHMS628091-supplement-1.pdf]

**Supplementary Information for:**

**Targeting  $\alpha 4\beta 7$  integrin reduces mucosal transmission of SIV and protects GALT from infection**

Siddappa N. Byrareddy<sup>1,8</sup>, Brianne Kallam<sup>1,8</sup>, James Arthos<sup>2</sup>, Claudia Cicala<sup>2</sup>, Fatima Nawaz<sup>2</sup>, Joseph Hiatt<sup>2</sup>, Ellen N. Kersh<sup>3</sup>, Janet M. McNicholl<sup>3</sup>, Debra Hanson<sup>3</sup>, Keith A. Reimann<sup>4</sup>, Markus Brameier<sup>5</sup>, Lutz Walter<sup>5</sup>, Kenneth Rogers<sup>6</sup>, Ann E. Mayne<sup>1</sup>, Paul Dunbar<sup>1</sup>, Tara Villinger<sup>1</sup>, Dawn Little<sup>1</sup>, Tristram G. Parslow<sup>1</sup>, Philip J. Santangelo<sup>7</sup>, Francois Villinger<sup>1,6</sup>, Anthony S. Fauci<sup>2</sup>, and Aftab A. Ansari<sup>1</sup>

<sup>1</sup>Department of Pathology and Laboratory Medicine, Emory University School of Medicine, Atlanta, GA 30322, USA

<sup>2</sup>Laboratory of Immunoregulation, National Institute of Allergy & Infectious Diseases, NIH, Bethesda, Maryland 20892

<sup>3</sup>Division of HIV/AIDS Prevention, Centers for Disease Control and Prevention, Atlanta, Georgia, 30333

<sup>4</sup>Mass Biologics, University of Massachusetts Medical School, 460 Walk Hill St. Boston, MA 02126

<sup>5</sup>Primate Genetics Laboratory, German Primate Center, Leibniz-Institute for Primate Research, Göttingen, Germany

<sup>6</sup>Division of Pathology, Yerkes National Primate Research Center, Emory University, Atlanta, GA 30329, USA

<sup>7</sup>Wallace H. Coulter Department of Biomedical Engineering, Georgia Institute of Technology and Emory University, 313 Ferst Drive, Atlanta, GA, 30680

<sup>8</sup>These authors contributed equally.

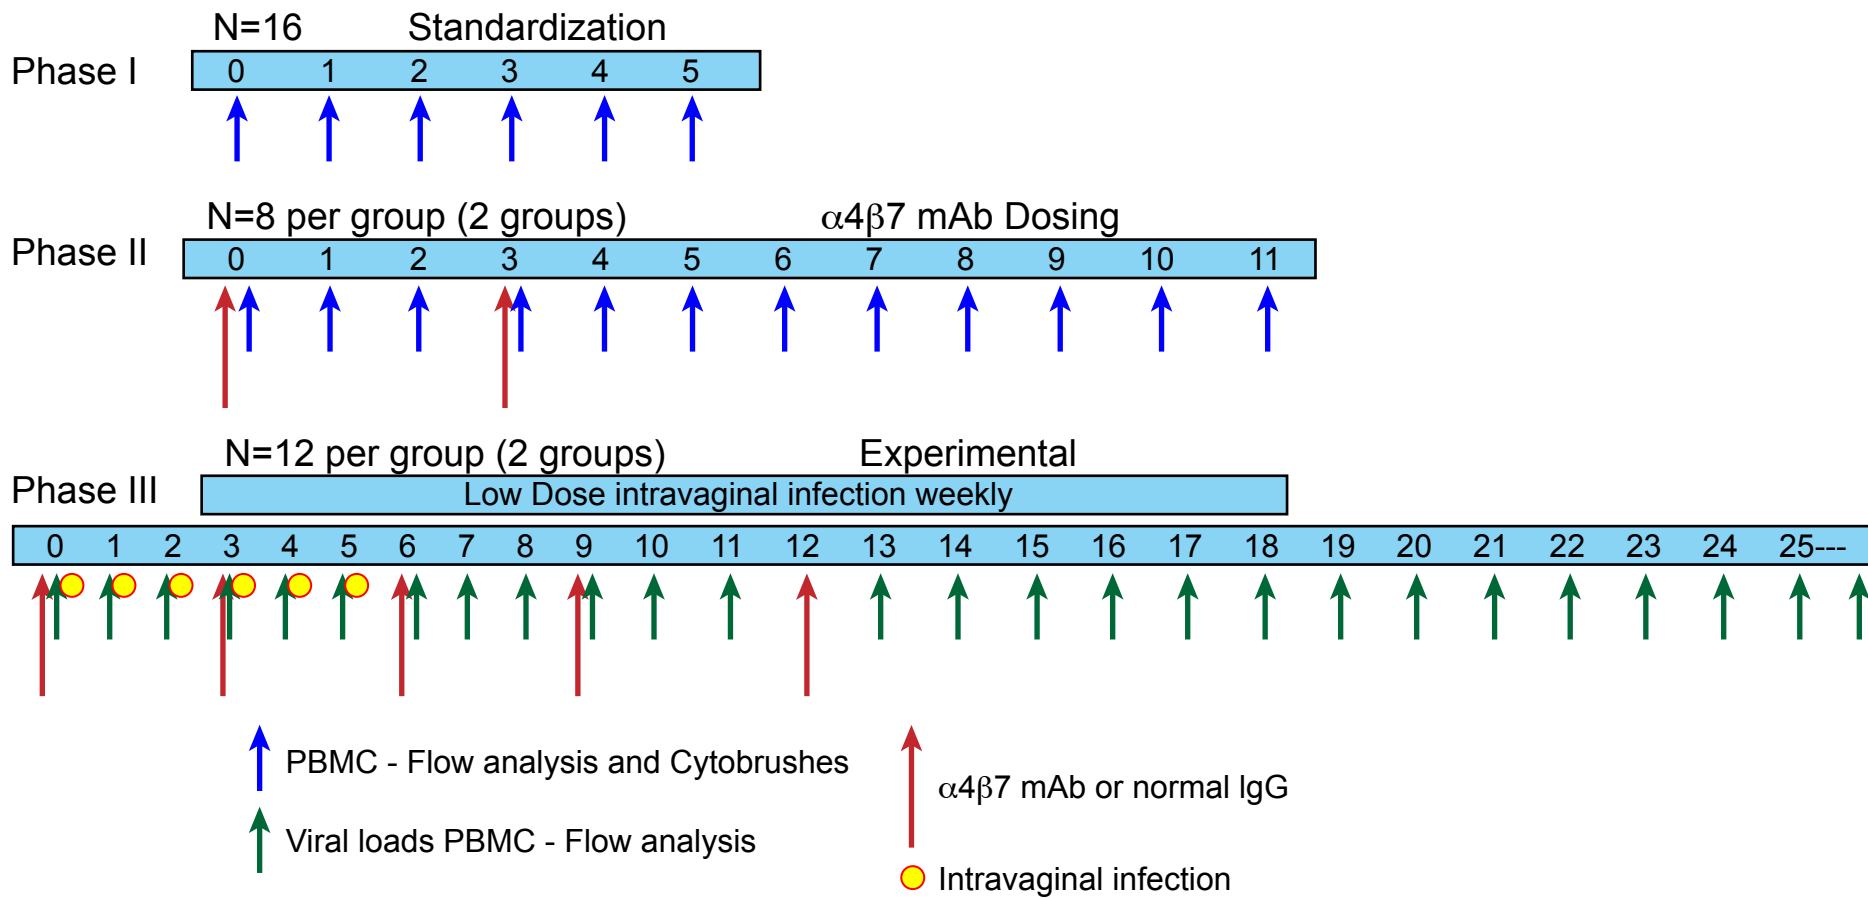

**Supplementary Figure 1. Study design:** The study protocol was performed in 3 phases. Phase I was performed to optimize the collection and analysis of cytobrush specimens (n=16 macaques). Data from Phase II was used to determine whether the  $\alpha 4\beta 7$ -mAb administered intravenously at 50 mg/kg reached the cells within the female reproductive tract as defined by analysis of cytobrush specimens (n=8). Phase III (n=12 macaques per study group) involved the administration of either the  $\alpha 4\beta 7$ -mAb or the rhesus IgG at 50 mg/kg every 3 weeks intravenously starting at day -3. Macaques were challenged IVAG with 1 ml of the stock virus (1:20 dilution, 36 ng p27) IVAG once a week until the macaques were confirmed to be infected. The challenges were terminated after 10/12 rhesus IgG treated macaques became infected.

### a Uninfected Cytobrush samples

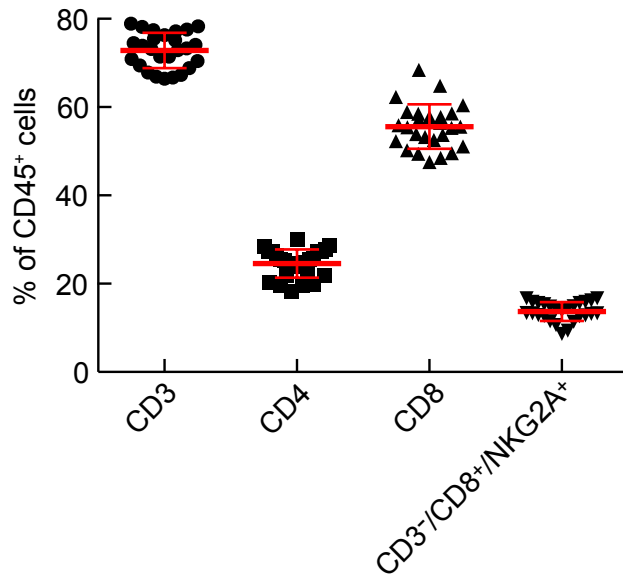

### b Uninfected Gut samples

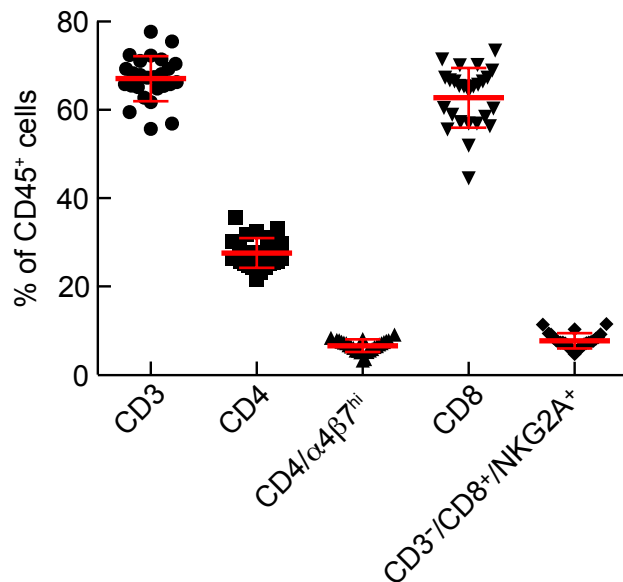

### c α4β7 representative profile

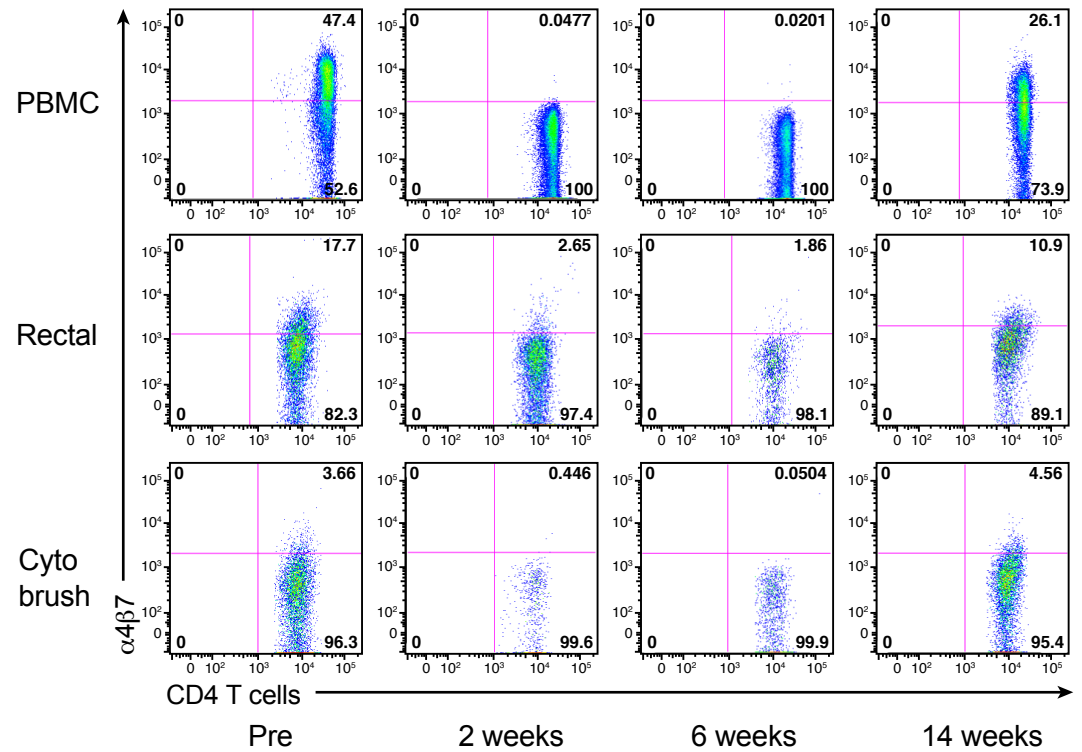

### d Detection of α4β7 masked receptors w/α4 mAb

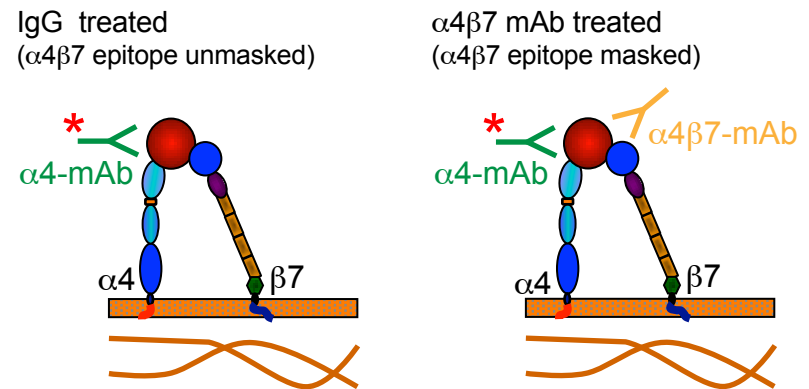

**Supplementary Figure 2. Flow-cytometric analysis of PBMC, GIT biopsies and cytobrush specimens prior to and post treatment with the α4β7-mAb:** Baseline studies comparing the frequencies of CD3<sup>+</sup>, CD4<sup>+</sup>, CD8<sup>+</sup> and CD3<sup>-</sup>/CD8<sup>+</sup>/NKG2a<sup>+</sup> subsets in the CD45<sup>+</sup> gated population of cells obtained from cytobrush samples (a) and the corresponding gastro-intestinal biopsy tissues (b) from uninfected macaques prior to Phase I. Representative flow-cytometric profiles of α4β7 expression of CD4<sup>+</sup>-T cells from the PBMC, rectal biopsy and cytobrush cells obtained pre-infusion, and weeks 2, 6, and 14 post-infusion (c). Such lack of detection of the α4β7-mAb staining at weeks 2 and 6 was not observed post-infusion of rhesus IgG (data not shown). A schematic that graphically illustrates the strategy used to detect masking of α4β7 expression using a labeled mAb against the α4 integrin, that targets an epitope distinct from the epitope targeted by the infused/unlabeled α4β7-mAb (d). Reactivity of the anti-α4 integrin mAb remained unchanged pre- and post- α4β7-mAb infusion (data not shown), and as previously described<sup>10</sup>.

**a** Average  $\alpha 4\beta 7$  mAb concentration in plasma

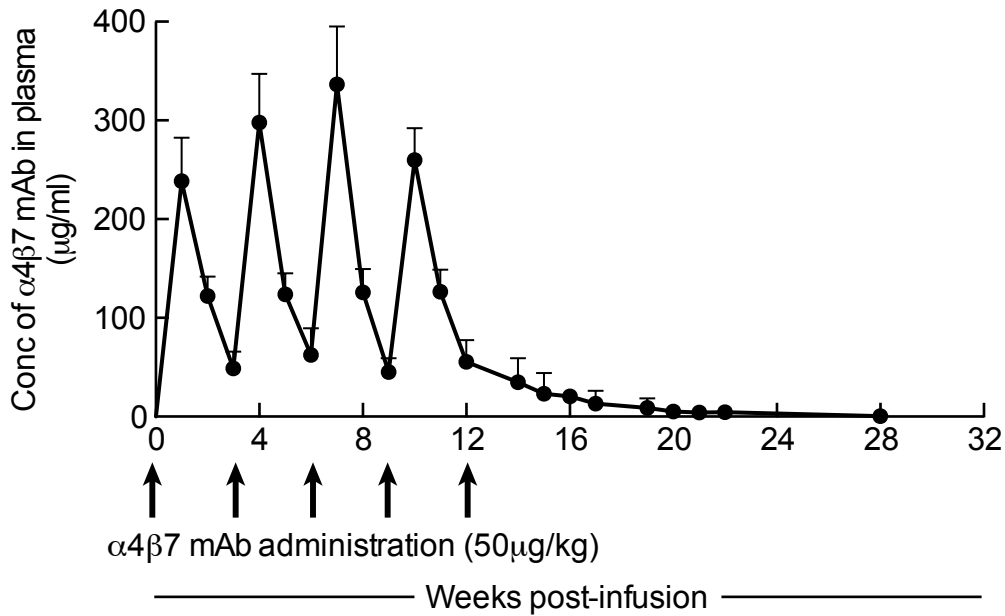

**b** Representative profiles of  $\alpha 4\beta 7$  mAb concentration in CVL

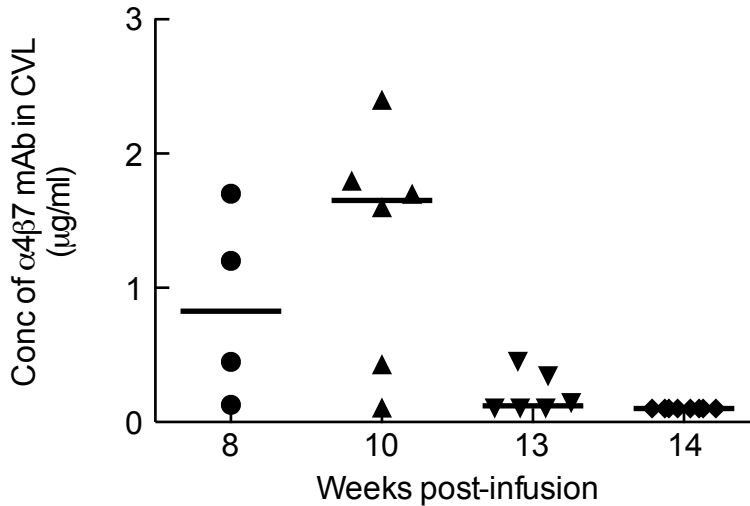

**Supplementary Figure 3. Levels of the  $\alpha 4\beta 7$ -mAb in plasma and CVL fluids:** Levels of the  $\alpha 4\beta 7$ -mAb ( $\mu\text{g/ml}$ ) in plasma samples from the 12 macaques that received the  $\alpha 4\beta 7$ -mAb ( $50\text{ mg/kg}$ ) intravenously starting day -3 and every 3 weeks (arrows). The data are mean  $\pm$  S. D. **(a)**. Levels of  $\alpha 4\beta 7$ -mAb ( $\mu\text{g/ml}$ ) in CVL fluids that were collected from animals RDg11 (+), RIz12 (+), RQm11 (+) and RRC9 (+/-) on week 8, animals ROC11 (+), RCw11 (+), RDg11 (+), RIz12 (+), RQm11\* (+) and RRC9 (+/-) on week 10, animals RCw11 (+/-), RDg11 (+), RIz12 (+), ROC11 (+), RQm11 (+/-) and RRC9 (+/-) on week 13 and animals PWW (+/-), RfK11 (+/-), RLn12 (+/-), RQf10\* (+/-), RRq9 (+/-) and RvI7(+/-) on week 14 (asterisk indicates samples collected during menses). The (+) indicated values  $> 0.1\text{ ug/ml}$  (significant) and the (+/-) indicated values just above the level of detection (non-significant) **(b)**.

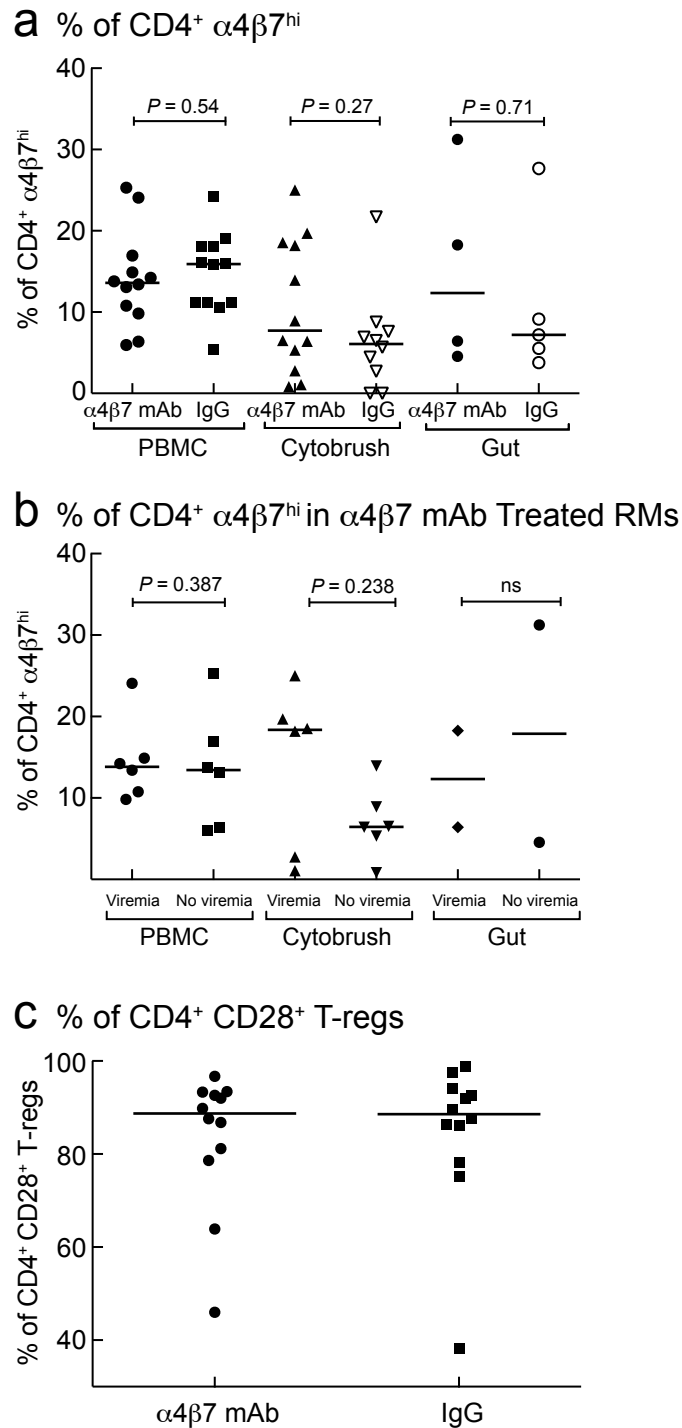

**Supplementary Figure 4. Baseline frequencies of CD4+α4β7<sup>hi</sup> and Tregs:** Baseline samples taken prior to treatment of PBMCs, cytobrush obtained mononuclear cells, and cells isolated from the GIT biopsy specimens, from the macaques that received α4β7-mAb (n=12) or rhesus IgG (n=12) were assayed for frequencies of CD4+ α4β7<sup>hi</sup> cells (Mann-Whitney *U*-test; *P*>0.05) (a). Comparison of the frequencies of CD4+ α4β7<sup>hi</sup> cells in the macaques that received α4β7-mAb and became viremic vs. those that remained aviremic (Mann-Whitney *U*-test; *P*>0.05) (b). Frequencies of Tregs prior to initiation of study (c).

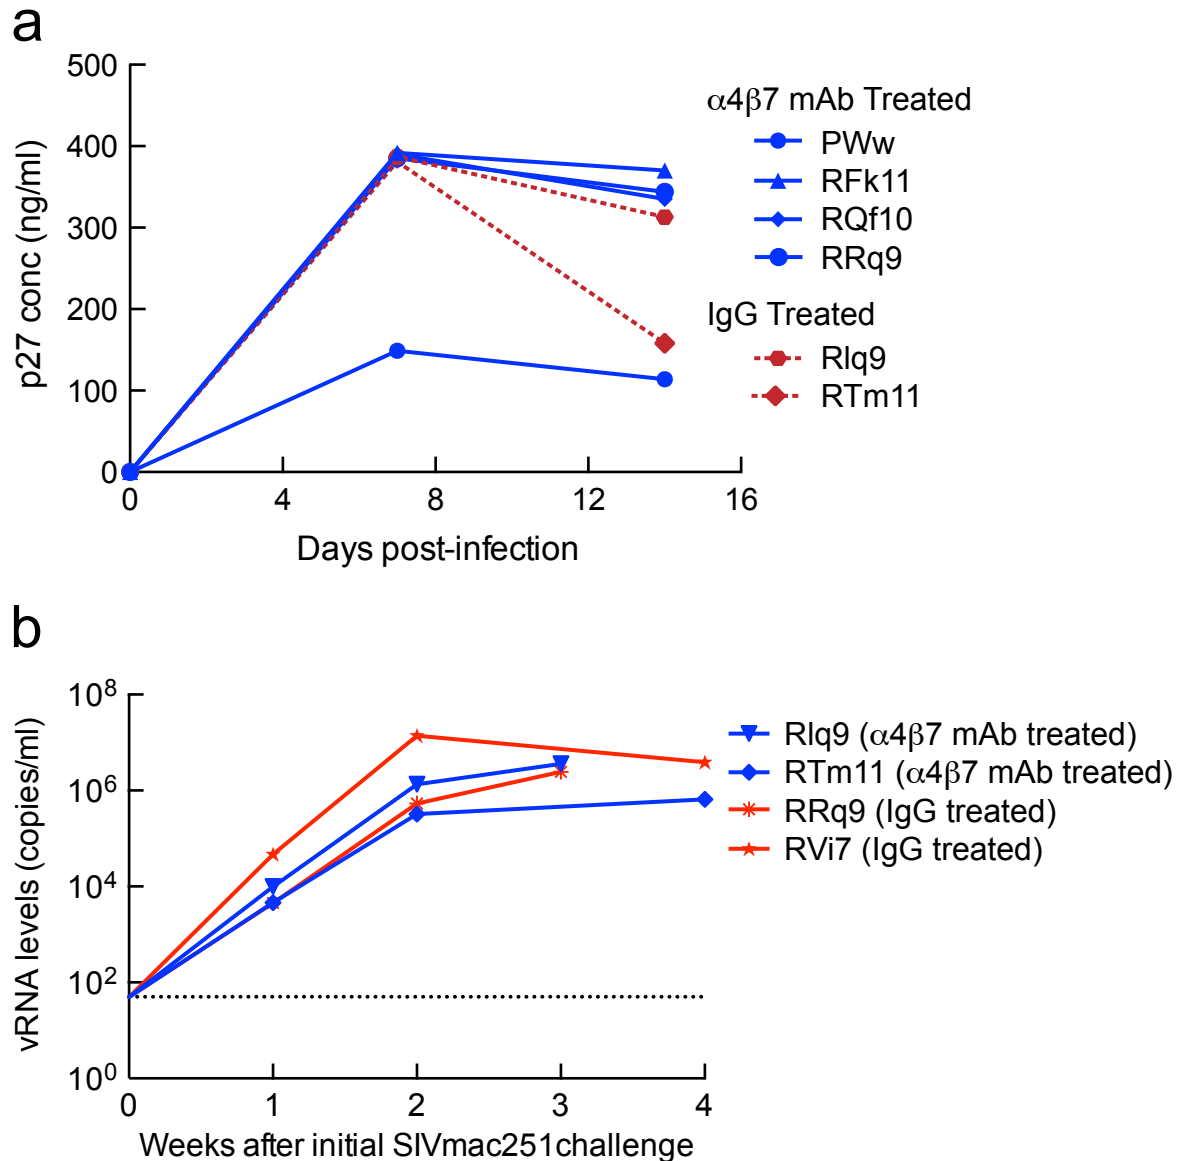

**Supplementary Figure 5. *In vitro* and *in vivo* testing of susceptibility to infection:**

Anti-CD3/CD28 immunobead activated PBMCs from 2/12 macaques that received rhesus IgG (RIq9 and RTM11) and 4/6 that received  $\alpha 4\beta 7$ -mAb (PWw, RFk11, RQf10 and RRq9) that were resistant to IVAG infection, were tested for their *in vitro* susceptibility to infection using an aliquot of the same SIVmac251 as described in the methods section. Levels of p27 (ng/ml) in the culture supernatant fluids (a). Two animals from the control IgG group (RIq9 and RTM11) and 2 from the  $\alpha 4\beta 7$ -mAb group (RRq9 and RVi7) that were resistant to IVAG infection were challenged intra-rectally with 1 ml of the undiluted SIVmac251 stock virus and administered the same doses and schedule of  $\alpha 4\beta 7$ -mAb or rhesus IgG, respectively as described in the methods section. Plasma viral loads (vRNA copies/ml) on these 4 macaques are illustrated as a function of time (b).

Table 1a. MHC /TRIM5 $\alpha$  Genotyping of Rhesus Macaques

| RM name                                                | MHC class I |     |     |     |                                                  | TRIM5 $\alpha$ |    |     |             |
|--------------------------------------------------------|-------------|-----|-----|-----|--------------------------------------------------|----------------|----|-----|-------------|
|                                                        | A1*         | A2* | A3* | A4* | B*                                               | Cyp A          | Q  | TFP | Restriction |
| <u>IgG treated</u>                                     |             |     |     |     |                                                  |                |    |     |             |
| RBs9                                                   | 003, 007    |     |     |     | 007, 022, 030, 031                               | x              | x  |     | Moderate    |
| REo8                                                   | 004, 008    |     | 13  | 14  | 012, 022, 030, 031, 038, 046, 047, 082           |                |    |     |             |
| RHy12                                                  | 002, 004    |     |     | 14  | 021, 045, 060, 069                               | x              | x  |     | Moderate    |
| RIq9                                                   | 001, 023    |     |     | 14  | 001, 007, 019, 024, 030, 057, 082                |                | x  | x   | Moderate    |
| RKs11                                                  | 004         |     |     | 14  | 012, 021, 022, 028, 030, 031, 045, 057, 060      |                |    | xx  | High        |
| RLc12                                                  | 004, 007    |     |     | 14  | 012, 021, 022, 028, 030, 031, 045, 057, 060, 068 |                |    | xx  | High        |
| RRn11                                                  | 006, 019    |     |     | 14  | 001, 047, 069                                    |                | x  | x   | Moderate    |
| RTm11                                                  | 001, 004    |     |     | 14  | 012, 021, 028, 030, 038, 045, 046, 060, 082      |                |    | xx  | High        |
| RVw10                                                  | 001, 003    |     |     |     | 047, 082, 093                                    | x              |    | x   | High        |
| RWt9                                                   | 001, 026    |     |     | 14  | 012, 022, 030, 031, 038, 047, 057, 082           |                |    | xx  | High        |
| RZz10                                                  | 002, 004    |     |     | 14  | 012, 022, 030, 031, 035, 049, 098                |                | x  | x   | Moderate    |
| RCd12                                                  | 004,007     |     |     | 14  | 012, 022, 023, 030, 031, 057, 068                |                | x  | x   | Moderate    |
| <u><math>\alpha</math>4<math>\beta</math>7 treated</u> |             |     |     |     |                                                  |                |    |     |             |
| PWw                                                    | 002, 008    |     | 13  | 02  | 012, 021, 022, 028, 030, 031, 045                |                | x  | x   | Moderate    |
| RCw11                                                  | 004, 025    |     |     | 14  | 005, 012, 015, 022, 030, 031, 178                |                |    | xx  | High        |
| RDg11                                                  | 004         |     |     | 14  | 005, 012, 015, 022, 030, 049, 178                |                |    | xx  | High        |
| RFk11                                                  | 004, 025    |     |     | 14  | 012, 015, 022, 027, 030, 031, 044                | x              | x  |     | Moderate    |
| RIz12                                                  | 006, 011    |     |     | 14  | 001, 007, 030, 046, 050, 065, 069, 078           |                | xx |     | Susceptible |
| RLn12                                                  | 001, 004    |     |     | 14  | 012, 022, 030, 031, 082                          | xx             |    |     | High        |
| ROc11                                                  | 001, 004    |     |     | 14  | 012, 021, 028, 030, 045, 082                     |                |    | xx  | High        |
| RQf10                                                  | 001, 041    |     |     |     | 004, 007, 030                                    |                |    |     |             |
| RQm11                                                  | 004, 019    |     |     | 14  | 012, 022, 030, 031, 069                          |                |    | xx  | Susceptible |
| RRc9                                                   | 004         |     |     | 14  | 012, 022, 030, 031, 048                          | x              | x  |     | Moderate    |
| RRq9                                                   | 004, 026    |     |     |     | 006, 047, 071                                    |                |    |     |             |
| RVi7                                                   | 004, 008    |     | 13  | 14  | 015, 030, 031, 043, 178                          |                |    | xx  | High        |

Table 1b: FcRγ typing

| RM name             | CD16 (FcγRIII) |      |      | CD64 (FcγRI)      |                   |                   |                   |                   |                   |                   | CD32b (FcγRIIb)            |                            |
|---------------------|----------------|------|------|-------------------|-------------------|-------------------|-------------------|-------------------|-------------------|-------------------|----------------------------|----------------------------|
|                     | 3A-1           | 3A-2 | 3A-3 | Allele 1<br>QVVRL | Allele 2<br>QVARL | Allele 3<br>EVSLS | Allele 4<br>QVVSF | Allele 5<br>QVVRF | Allele 6<br>QAVRL | Allele 7<br>QAVSL | Allele 1<br>(I59,<br>L133) | Allele 2<br>(T59,<br>P133) |
| <u>IgG treated</u>  |                |      |      |                   |                   |                   |                   |                   |                   |                   |                            |                            |
| RBs9                | x              | x    |      | x                 |                   |                   |                   |                   |                   | x                 |                            |                            |
| REo8                | xx             |      |      | xx                |                   |                   |                   |                   |                   |                   |                            |                            |
| RHy12               | x              | x    |      | x                 |                   |                   |                   |                   |                   | x                 |                            |                            |
| Rlq9                |                | xx   |      | x                 |                   |                   |                   |                   |                   |                   | x                          |                            |
| RKs11               | x              | x    |      | xx                |                   |                   |                   |                   |                   |                   |                            |                            |
| RLc12               | x              | x    |      | xx                |                   |                   |                   |                   |                   |                   |                            |                            |
| RRn11               | x              | x    |      | xx                |                   |                   |                   |                   |                   |                   |                            |                            |
| RTm11               |                | xx   |      | xx                |                   |                   |                   |                   |                   |                   |                            |                            |
| RVw10               | x              | x    |      |                   |                   |                   |                   |                   |                   |                   |                            |                            |
| RWt9                |                | xx   |      | xx                |                   |                   |                   |                   |                   |                   |                            |                            |
| RZz10               | x              | x    |      | xx                |                   |                   |                   |                   |                   |                   |                            |                            |
| RCd12               | xx             |      |      | xx                |                   |                   |                   |                   |                   |                   |                            |                            |
| <u>α4β7 treated</u> |                |      |      |                   |                   |                   |                   |                   |                   |                   |                            |                            |
| PWw                 |                | x    | x    | xx                |                   |                   |                   |                   |                   |                   |                            | xx                         |
| RCw11               | x              | x    |      | xx                |                   |                   |                   |                   |                   |                   |                            | xx                         |
| RDg11               | xx             |      |      | xx                |                   |                   |                   |                   |                   |                   |                            | xx                         |
| RFk11               | x              | x    |      | xx                |                   |                   |                   |                   |                   |                   |                            | xx                         |
| Rlz12               | x              | x    |      | xx                |                   |                   |                   |                   |                   |                   |                            | xx                         |
| RLn12               |                | xx   |      | xx                |                   |                   |                   |                   |                   |                   |                            | xx                         |
| ROc11               | x              | x    |      | x                 |                   |                   |                   |                   | x                 |                   |                            | xx                         |
| RQf10               | x              | x    |      | xx                |                   |                   |                   |                   |                   |                   |                            | xx                         |
| RQm11               |                | xx   |      | x                 |                   |                   |                   |                   | x                 |                   |                            | xx                         |
| RRc9                | x              | x    |      | xx                |                   |                   |                   |                   |                   |                   |                            | xx                         |
| RRq9                | x              | x    |      |                   |                   |                   | x                 |                   | x                 |                   |                            | xx                         |
| RVi7                | x              | x    |      | xx                |                   |                   |                   |                   |                   |                   |                            | xx                         |

x, could also be allele combination 5 and 7 Q(V/A)V(R/S)(L/F)



Table 1c: KIR Genotypes of rhesus macaques

| Animal Name                                          | 3D<br>L01 | 3D<br>L02 | 3D<br>L04 | 3D<br>L05 | 3D<br>L06 | 3D<br>L07 | 3D<br>L08 | 3D<br>L10 | 3D<br>L11 | 3D<br>S01 | 3D<br>S02 | 3D<br>S03 | 3D<br>S04 | 3D<br>S05 | 3D<br>S06 | 3D<br>S07 | 3DL<br>W03 | 3DS<br>W08 | 3DS<br>W09 |
|------------------------------------------------------|-----------|-----------|-----------|-----------|-----------|-----------|-----------|-----------|-----------|-----------|-----------|-----------|-----------|-----------|-----------|-----------|------------|------------|------------|
| <b>IgG treated RMs</b>                               |           |           |           |           |           |           |           |           |           |           |           |           |           |           |           |           |            |            |            |
| RBs9                                                 | X         |           |           |           |           |           | X         |           |           |           | X         |           | X         |           |           |           |            |            |            |
| REo8                                                 | X         | X         |           | X         |           | X         |           |           |           |           | X         |           | X         |           |           |           |            |            |            |
| RHy12                                                | X         | X         |           |           |           | X         |           | X         |           |           | X         |           | X         | X         |           |           |            |            |            |
| RIq9                                                 | X         |           |           | X         |           |           |           | X         | X         |           |           |           |           |           |           |           |            |            |            |
| RKs11                                                |           | ND        |           |           |           | ND        | X         | X         |           |           | X         |           |           | X         |           |           |            |            | X          |
| RLc12                                                | X         | X         |           |           |           | X         |           | X         |           |           | X         |           |           |           |           | X         |            |            | X          |
| RRn11                                                | X         |           |           | X         |           | X         | X         |           |           |           | X         |           |           |           | X         |           | X          |            |            |
| RTm11                                                | X         | X         |           |           |           |           |           | X         |           | X         | X         |           |           |           |           |           |            |            |            |
| RVw10                                                | X         | X         |           | X         |           | X         | X         |           |           |           | X         |           | X         |           | X         |           |            |            | X          |
| RWt9                                                 | X         |           |           | X         |           |           |           | X         |           |           | X         |           | X         |           |           |           |            |            |            |
| RZz10                                                |           |           |           |           |           | X         | X         |           |           |           | X         |           |           |           | X         |           |            |            | X          |
| RCd12                                                | X         |           |           | X         |           | X         | X         | X         |           |           | X         |           |           | X         | X         |           |            |            |            |
| <b>anti-<math>\alpha 4\beta 7</math> treated RMs</b> |           |           |           |           |           |           |           |           |           |           |           |           |           |           |           |           |            |            |            |
| PWw                                                  |           | X         |           | X         |           |           | X         |           | X         |           | X         |           |           | X         |           |           |            |            | X          |
| RCw11                                                | X         |           |           |           |           | X         | X         |           | X         |           | X         |           |           |           | X         |           |            |            |            |
| RDg11                                                | X         | X         |           | X         |           |           |           |           |           |           |           |           |           |           |           |           | X          | X          |            |
| RFk11                                                | X         |           |           |           |           |           | X         |           |           |           | X         |           |           |           |           |           |            |            |            |
| RIz12                                                |           | X         |           | X         |           | X         | X         |           | X         |           | X         |           |           | X         |           |           |            |            | X          |
| RLn12                                                | X         |           |           |           |           |           | X         |           |           |           |           |           |           | X         |           |           |            | X          | X          |
| ROc11                                                | X         | X         |           |           |           | X         |           |           |           | X         |           |           |           |           |           |           |            | X          |            |
| RQf10                                                | X         |           |           |           |           | X         | X         |           |           |           | X         |           | X         |           | X         |           |            |            | X          |
| RQm11                                                | X         | ND        |           |           |           |           |           |           | ND        | X         |           |           |           |           |           |           |            |            |            |
| RRc9                                                 | X         |           |           | X         |           |           | X         |           |           |           | X         |           |           |           | X         |           |            |            | X          |
| RRq9                                                 | X         | X         |           |           |           | X         |           |           | X         |           |           |           |           |           | X         |           |            |            |            |
| RVi7                                                 | X         | ND        |           |           |           | ND        | X         |           |           |           |           |           |           |           |           |           |            |            |            |

X, present, ND, not distinguishable

**Supplementary Table 1.** The results of MHC and TRIM5 $\alpha$  genotyping (a) FcR $\gamma$  genotyping (b) and KIR genotyping (c) of the macaques that received control rhesus IgG (n = 12) or the  $\alpha 4\beta 7$  mAb (n=12).

Table 2. Reproductive history of monkeys

| Animal Name                                                     | Date of Birth | Apx. Age in yrs at time of challenge | # of Pregnancies (babies) | # menses during viral challenge/total challenges |
|-----------------------------------------------------------------|---------------|--------------------------------------|---------------------------|--------------------------------------------------|
| <b>IgG treated RMs</b>                                          |               |                                      |                           |                                                  |
| RBs9                                                            | 4/25/03       | 10                                   | 3(3)                      | 0/3                                              |
| REo8                                                            | 5/17/01       | 12                                   | 0                         | 1/2                                              |
| RHy12                                                           | 7/11/08       | 5                                    | 0                         | 1/1                                              |
| RIq9                                                            | 4/16/03       | 10                                   | 5(5)                      | 1/6                                              |
| RKs11                                                           | 6/11/06       | 7                                    | 1(1)                      | 0/2                                              |
| RLc12                                                           | 5/19/07       | 6                                    | 0                         | 0/2                                              |
| RRn11                                                           | 4/24/06       | 7                                    | 0                         | 0/1                                              |
| RTm11                                                           | 4/20/06       | 7                                    | 0                         | 1/6                                              |
| RVw10                                                           | 8/28/04       | 9                                    | 3(3)                      | 1/4                                              |
| RWt9                                                            | 5/02/03       | 10                                   | 2(2)                      | 0/4                                              |
| RZz10                                                           | 4/03/05       | 8                                    | 1(1)                      | 0/3                                              |
| RCd12                                                           | 5/28/07       | 6                                    | 0                         | 0/2                                              |
| <b>anti-<math>\alpha</math>4<math>\beta</math>7 treated RMs</b> |               |                                      |                           |                                                  |
| PWw                                                             | 5/15/96       | 17                                   | 3(3)                      | 0/6                                              |
| RCw11                                                           | 4/04/07       | 6                                    | 0                         | 0/6                                              |
| RDg11                                                           | 5/25/05       | 8                                    | 2(1)                      | 1/5                                              |
| RFk11                                                           | 3/25/06       | 7                                    | 0                         | 0/6                                              |
| RIz12                                                           | 8/15/08       | 5                                    | 0                         | 1/5                                              |
| RLn12                                                           | 4/10/08       | 5                                    | 0                         | 0/6                                              |
| ROc11                                                           | 4/23/05       | 8                                    | 1(1)                      | 0/5                                              |
| RQf10                                                           | 8/07/03       | 10                                   | 1(1)                      | 1/6                                              |
| RQm11                                                           | 4/19/06       | 7                                    | 1(1)                      | 0/4                                              |
| RRc9                                                            | 4/23/02       | 11                                   | 2(2)                      | 0/5                                              |
| RRq9                                                            | 4/18/03       | 10                                   | 4(4)                      | 1/6                                              |
| RVi7                                                            | 2/13/00       | 13                                   | 3(3)                      | 0/6                                              |

**Supplementary Table 2.** The date of birth, age at the time of initiation of study, the number of pregnancies (reproductive history) and the number of times during viral challenges/total viral challenges each monkey was menses based on plasma levels of progesterone and estradiol for each of the 24 monkeys studied.
